# Supplementary material
Source: publisher figshare collection journal article supplement (https://acs.figshare.com/ndownloader/files/13277255)
Supplement: Supplementary file 1 [file 13277255]

Supporting information

---

**Pretreatment with  $\gamma$ -valerolactone/[Mmim]DMP and enzymatic hydrolysis  
on corncob and its application in immobilized butyric acid fermentation**

Wenxiu Zheng<sup>1</sup>, Xujie Liu<sup>2</sup>, Liying Zhu<sup>3</sup>, He Huang<sup>1</sup>, Tianfu Wang<sup>4</sup>, Ling Jiang<sup>5,\*</sup>

<sup>1</sup>College of Pharmaceutical Sciences, Nanjing Tech University, Nanjing 210009, PR China.

<sup>2</sup>College of Biotechnology and Pharmaceutical Engineering, Nanjing Tech University,

Nanjing 210009, PR China. <sup>3</sup>College of Chemical and Molecular Engineering, Nanjing

Tech University, Nanjing 210009, PR China. <sup>4</sup>Laboratory of Environmental Science and

Technology, The Xinjiang Technical Institute of Physics & Chemistry, Key Laboratory of

Functional Materials and Devices for Special Environments, Chinese Academy of Sciences,

Urumqi 830011, PR China. <sup>5</sup>College of Food Science and Light Industry, Nanjing Tech

University, Nanjing 210009, PR China.

\*Corresponding author: Ling Jiang, jiangling@njtech.edu.cn.

17 **Tables**

18 **Table S1.** Factors and levels of orthogonal experimental design of enzymatic hydrolysis

19 conditions

| Level | Enzyme        | Substrate     | Reaction    | pH  | Reaction |
|-------|---------------|---------------|-------------|-----|----------|
|       | concentration | concentration | temperature |     | time     |
|       | (FPU/g)       | (g/L)         | (°C)        |     | (h)      |
| 1     | 45            | 40            | 40          | 4.6 | 64       |
| 2     | 50            | 45            | 45          | 4.8 | 68       |
| 3     | 55            | 50            | 50          | 5.0 | 72       |
| 4     | 60            | 55            | 55          | 5.2 | 76       |

20

**Table S2.** Design and results of the orthogonal enzymatic hydrolysis experiments

| Sample | Enzyme        | Substrate     | Reaction    | pH  | Reaction | Glucose   |
|--------|---------------|---------------|-------------|-----|----------|-----------|
|        | concentration | concentration | temperature |     | time     | yield (%) |
|        | (FPU/g)       | (g/L)         | (°C)        |     | (h)      |           |
| 1      | 45            | 40            | 40          | 4.6 | 64       | 76.3      |
| 2      | 45            | 45            | 45          | 4.8 | 68       | 80.9      |
| 3      | 45            | 50            | 50          | 5.0 | 72       | 93.2      |
| 4      | 45            | 55            | 55          | 5.2 | 76       | 75.4      |
| 5      | 50            | 40            | 45          | 5.0 | 76       | 81.8      |
| 6      | 50            | 45            | 40          | 5.2 | 72       | 87.1      |
| 7      | 50            | 50            | 55          | 4.6 | 68       | 72.6      |
| 8      | 50            | 55            | 50          | 4.8 | 64       | 71.9      |
| 9      | 55            | 40            | 50          | 5.2 | 68       | 77.7      |
| 10     | 55            | 45            | 55          | 5.0 | 64       | 62.9      |
| 11     | 55            | 50            | 40          | 4.8 | 76       | 85.5      |
| 12     | 55            | 55            | 45          | 4.6 | 72       | 81.3      |
| 13     | 60            | 40            | 55          | 4.8 | 72       | 83.4      |
| 14     | 60            | 45            | 50          | 4.6 | 76       | 79.4      |
| 15     | 60            | 50            | 45          | 5.2 | 64       | 77.6      |
| 16     | 60            | 55            | 40          | 5.0 | 68       | 72.5      |

---

|    |       |       |       |       |       |
|----|-------|-------|-------|-------|-------|
| K1 | 81.45 | 79.80 | 80.35 | 77.40 | 72.18 |
| K2 | 78.35 | 77.58 | 80.40 | 80.43 | 75.93 |
| K3 | 76.85 | 82.23 | 80.55 | 77.60 | 86.25 |
| K4 | 78.23 | 75.28 | 73.58 | 79.45 | 80.53 |
| R  | 4.60  | 6.95  | 7.00  | 3.03  | 14.08 |

---

## Figures

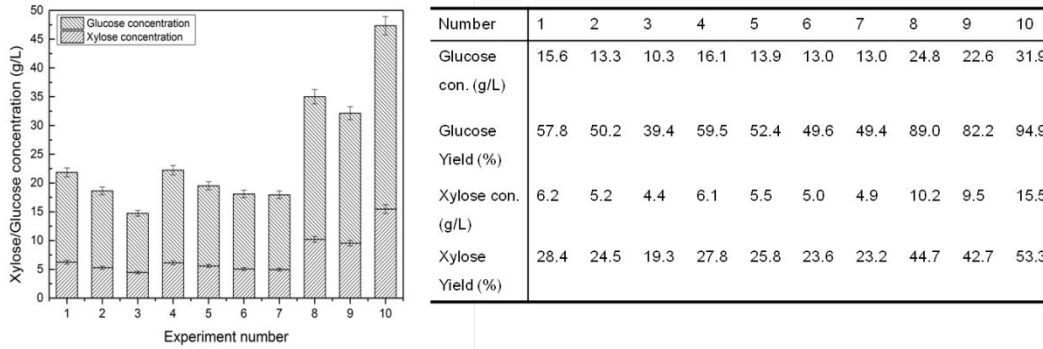

**Figure S1.** Comparison of glucose and xylose yields and concentrations of enzymatic hydrolysis of pretreated substrates under different pretreatment methods. The 1st to 9th experimental conditions were corresponding to the 9 conditions in **Table 2**, and the 10<sup>th</sup> was the optimal pretreated condition. The yield of glucose and xylose were calculated as Eq. (1) and Eq. (2):

$$Y_1\% = \frac{C \times V \times M_r \times 0.9}{m \times M_0} \times 100 \quad (1)$$

$$Y_2\% = \frac{C \times V \times M_r \times 0.88}{m \times M_0} \times 100 \quad (2)$$

where  $Y_1$  is the yield of glucose;  $Y_2$  is the yield of xylose;  $C$  is the obtained glucose/xylose concentration (g/L);  $V$  is the volume of enzyme solution (mL);  $M_r$  is the total amount of corncob residue recovered after pretreatment;  $m$  is the amount of residue used in the enzymatic reaction;  $M_0$  is the total amount of cellulose/xylan in corncob raw material used for the pretreatment; 0.9 is the conversion coefficient between glucose and cellulose; 0.88 is conversion coefficient between xylose and xylan.

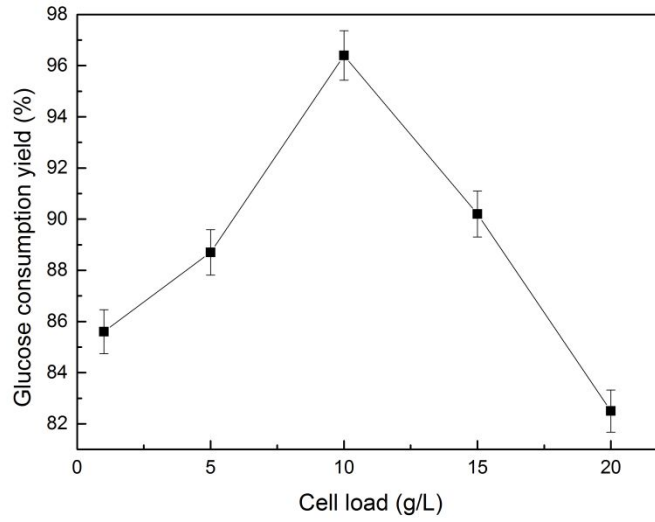

**Figure S2.** The glucose consumption yield of MCAL beads with five different cell load: 1 g/L, 5 g/L, 10 g/L, 15 g/L and 20 g/L. The glucose consumption yield was calculated as Eq. (3):

$$Y\% = \frac{C_0 - C_{48h}}{C_0} \times 100 \quad (3)$$

where  $C_0$  is the initial glucose concentration in culture;  $C_{48h}$  is the glucose concentration in culture after incubation for 48 hours.

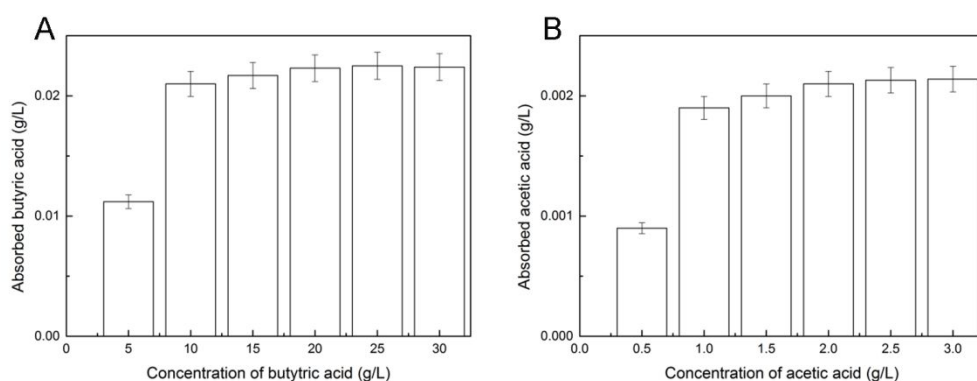

**Figure S3.** Adsorption isotherms on MCAL beads with different concentration of butyric acid (A) and acetic acid (B). Different amount of butyric acid and acetic acid (e.g., 5, 10, 15, 20, 25, 30 g/L of butyric acid and 0.5, 1, 1.5, 2, 2.5, 3 g/L of acetic acid) were prepared with the addition of 50 g/L MCAL beads in each solution. After the incubation for 48 hours, the final concentration of butyric acid and acetic acid in the supernatant were determined by GC analysis to calculate the amount of butyric acid and acetic acid lost. All assays were done in triplicates and run under parallel conditions.
